# Supplementary material for: Bright-blue-emission nitrogen and phosphorus-doped carbon quantum dots as a promising nanoprobe for detection of Cr(vi) and ascorbic acid in pure aqueous solution and in living cells
Source: Royal Society of Chemistry journal article supplement (doi:10.1039/c8nj02126k), 2018-01-01
Supplement: c8nj02126k1.pdf [file c8nj02126k1.pdf]

## Electronic supplementary Information

### Bright-blue-emission nitrogen and phosphorus doped carbon quantum dots as a promising nanoprobe for detection of Cr (VI) and ascorbic acid in pure aqueous solution and in living cell

Vikas Kumar Singh,<sup>a</sup> Virendra Singh,<sup>b</sup> Pradeep Kumar Yadav,<sup>a</sup> Subhas Chandra,<sup>a</sup> Daraksha Bano,<sup>a</sup> Vijay Kumar<sup>a</sup>, Biplob Koch,<sup>b</sup>, Mahe Talat<sup>a</sup> and Syed Hadi Hasan,<sup>\*a</sup>

<sup>a</sup>Department of Chemistry, Indian Institute of Technology (Banaras Hindu University), Varanasi-221005, U.P., India. E-mail:

<sup>b</sup>Department of Zoology, Institute of Science, Banaras Hindu University, Varanasi 221 005, UP, India.

---

| Contents                                                                                                                        | Pages |
|---------------------------------------------------------------------------------------------------------------------------------|-------|
| 1. (S1) TEM images showing average particle size .....                                                                          | S3    |
| 2. (S2) Size distribution of as synthesized N,P-CQDs in aqueous solution.....                                                   | S3    |
| 3. (S3) Zeta potential distribution of as synthesized N,P-CQDs.....                                                             | S4    |
| 4. (S4) P2p XPS spectra of as synthesized N,P-CQDs .....                                                                        | S4    |
| 5. (S5) Photograph of N,P- CQDs at different pH (2-11).....                                                                     | S5    |
| 6. (S6) Effect of Ionic strength on fluorescence intensity of N,P-CQDs .....                                                    | S5    |
| 7. (S7) Photostability of N,P-CQDs under visible light at ambient condition.....                                                | S5    |
| 8. (S8) Photograph (under UV-light) and bar diagram of fluorescence intensity of N,P-CQDs with Cr(VI) and other metal ions..... | S6    |
| 9.(S9) Stern- volmer plot .....                                                                                                 | S8    |

|                                                                                                                         |     |
|-------------------------------------------------------------------------------------------------------------------------|-----|
| 10. Detail about fluorescence quantum yield.....                                                                        | S9  |
| 11. (S10) Selective turn on sensing of ascorbic acid by N,P-CQDs + Cr (VI) system.....                                  | S9  |
| 12. (S11) Photograph under UV-light of N,P-CQDs with different analyte.....                                             | S10 |
| 13. (S12) Fluorescence spectra of N,P-CQDs + Cr (III), N,P-CQDs + Cr(VI)+ AA and other<br>combination of analyte.....   | S10 |
| 14. (S13) Quenching of Fluorescence intensity of N,P-CQDs after addition of (0 to 100 $\mu$ L)<br>Cr(VI) solution.....  | S11 |
| 15. (S14) Fluorescence recovery of N,P-CQDs + Cr(VI) system after addition of (0 to 150 $\mu$ L)<br>of AA solution..... | S11 |
| 16. (S15) Fluorescence recovery of N,P-CQDs + Cr(VI) as the function of time.....                                       | S12 |

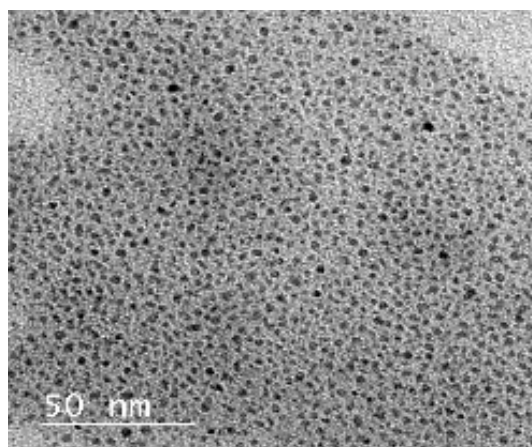

**Fig. S1.** TEM images showing average particle size approximately with 3.2 nm

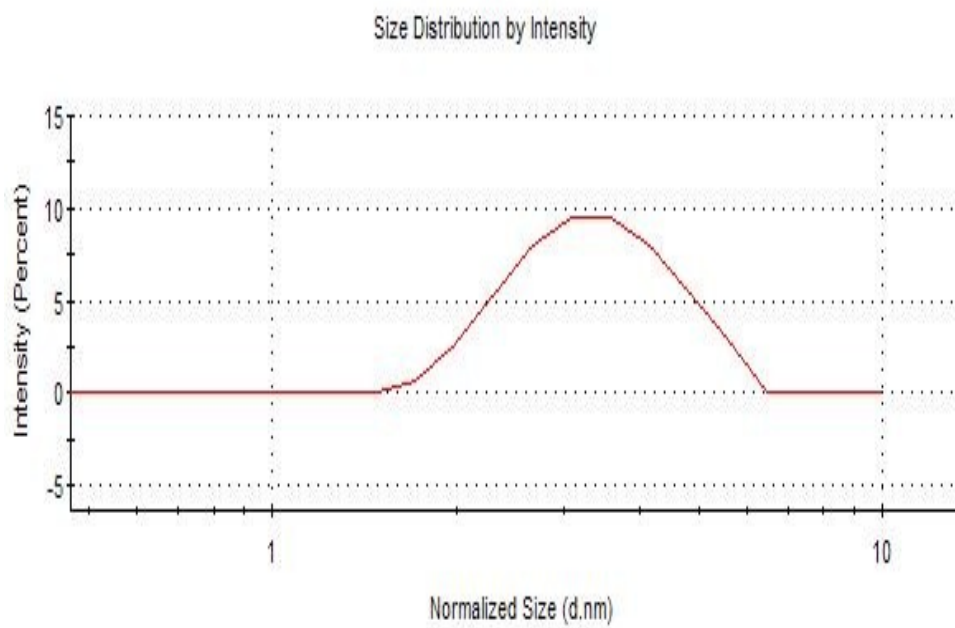

**Fig.S2.** Size distribution of as synthesized N,P-CQDs in aqueous solution.

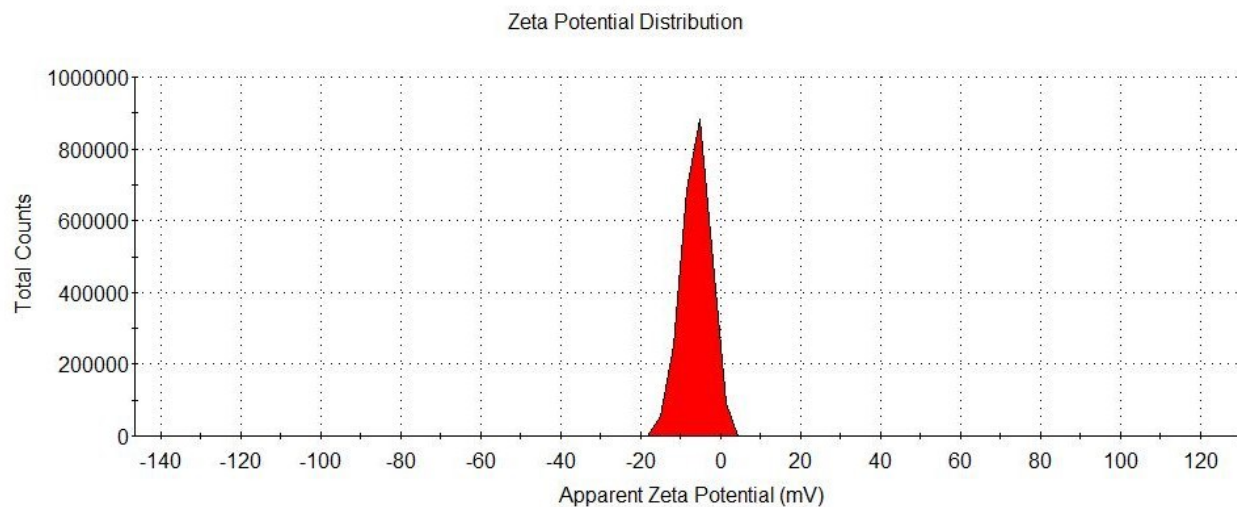

**Fig. S3.** Zeta potential distribution of as synthesized N,P-CQDs

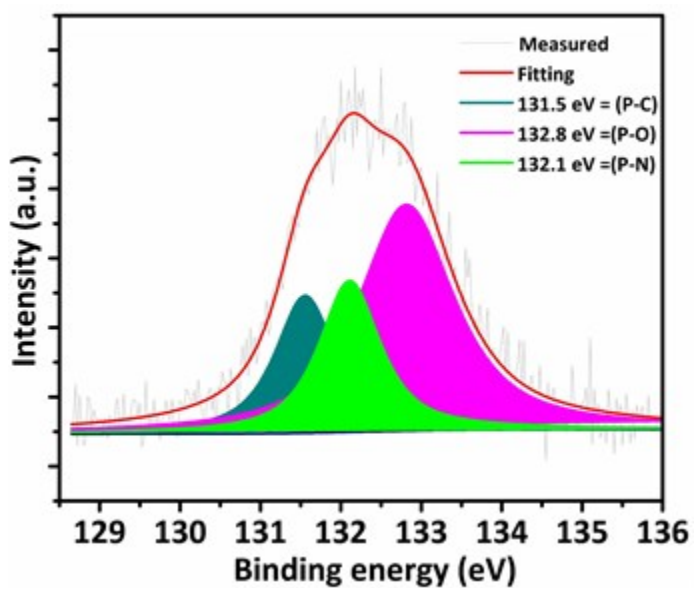

**Fig. S4.** P2p XPS spectra of as synthesized N,P-CQDs

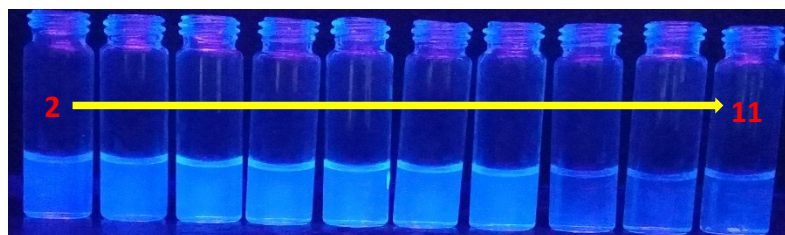

**Fig. S5.**  
Photograph of  
N,P- CQDs at  
different pH  
(2-11)  
illuminated by  
UV light at  
excitation  
wavelength  
365 nm.

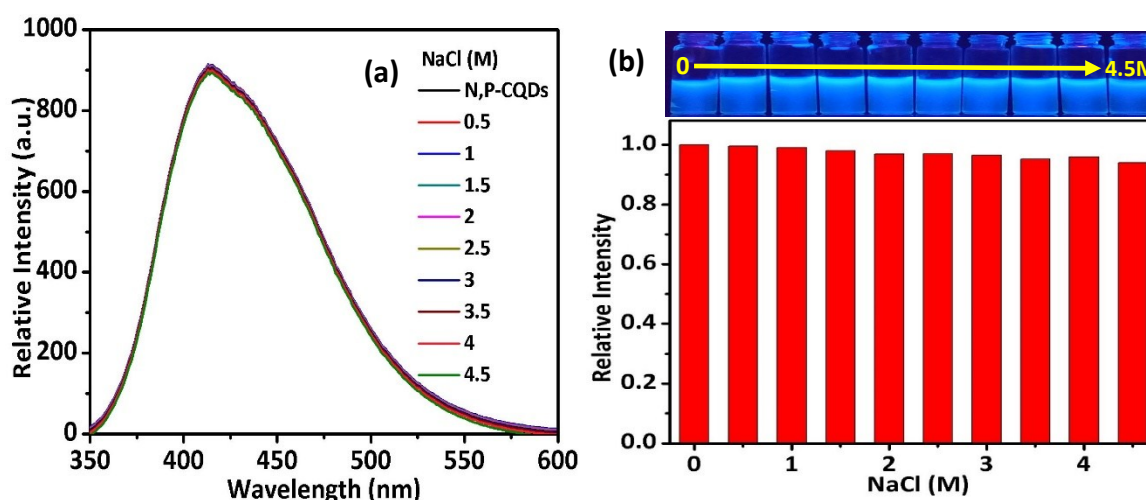

**Fig. S6.** (a)  
Effect of Ionic  
strength on  
fluorescence  
intensity of  
N,P-CQDs (b)  
photograph  
(under UV-  
light = 365  
nm) and bar  
diagram  
represent  
negligible  
change in

fluorescence after addition of NaCl solution (0.5 to 4.5 M )

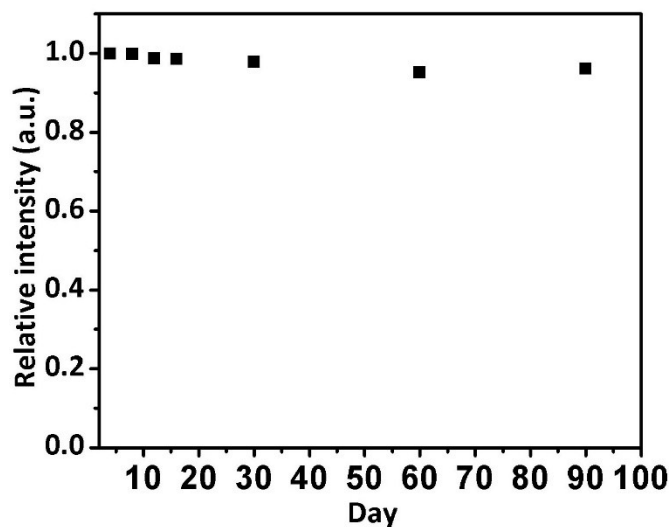

**Fig. S7.** Photostability of N,P-CQDs under visible light at ambient condition.

S5

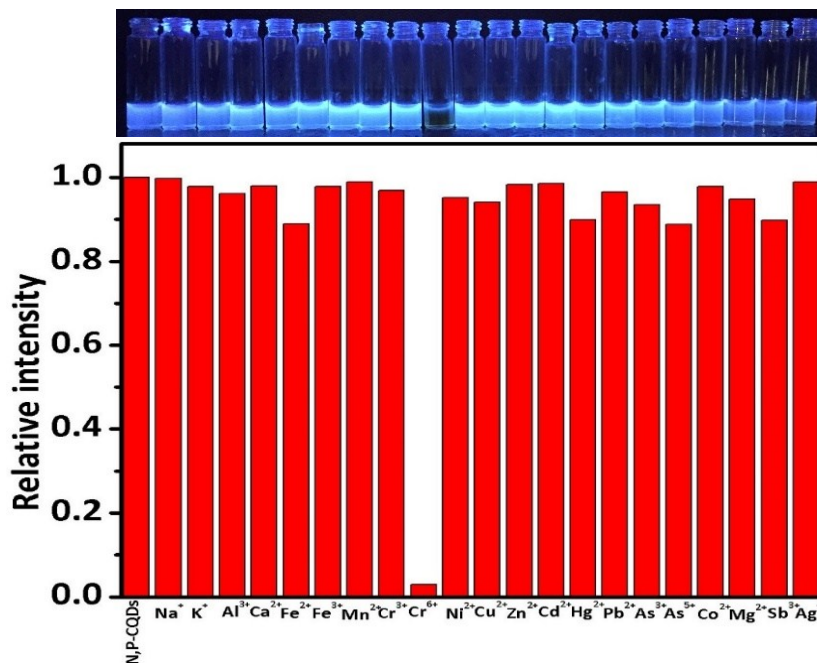

**Fig. S8.** Photograph showed selective sensing of Cr (VI) and bar diagram represent relative fluorescence intensity of N,P- CQDs (0.35 mg/ML) after addition 50  $\mu$ L of Cr(VI) ( $1 \times 10^{-3}$  M ) and other metal ions ( $1 \times 10^{-2}$  M) indicated negligible interference of other metal ions.

**Table S1.** Details of fluorescence lifetime measurement of N,P- CQDs in absence and presence of Cr(VI) and ascorbic acid (AA) along with average lifetime,  $\chi^2$  and weightage of tri-exponential best fit components.

| Compound                | Average life time (ns) | Chi-square | Different life time (ns)                                                                   | Corresponding Weight %  |
|-------------------------|------------------------|------------|--------------------------------------------------------------------------------------------|-------------------------|
| N,P-CQDs                | 3.56                   | 1.292      | $\tau_1 = 0.41$ (B1= 0.210)<br>$\tau_2 = 3.14$ (B2 = 0.023)<br>$\tau_3 = 9.05$ (B3= 0.006) | 40.96<br>34.20<br>24.85 |
| N,P –CQDs + Cr(VI)      | 3.48                   | 1.144      | $\tau_1 = 0.16$ (B1=0.379)<br>$\tau_2 = 1.00$ (B2= 0.059)<br>$\tau_3 = 5.39$ (B3=0.033)    | 35.96<br>25.21<br>38.83 |
| N,P- CQDs + Cr(VI) + AA | 3.53                   | 1.358      | $\tau_1 = 0.22$ (B1=0.250)<br>$\tau_2 = 1.08$ (B2=0.066)<br>$\tau_3 = 5.30$ (B3= 0.035)    | 29.33<br>30.44<br>40.23 |

The fluorescence decays profile of N,P-CQDs were best fitted with a tri-exponential function. The suitability of the best fit was judged by reduced Chi-square values and the corresponding residual distribution. The acceptable fit has a Chi-square close to unity.

The fitting procedure of the emission intensity decays  $I_{(t)}$  uses a tri-exponential model according to the following expression:

$$I_{(t)} = B_1 \exp(-t / \tau_1) + B_2 \exp(-t / \tau_2) + B_3 \exp(-t / \tau_3)$$

Where  $\tau_1$ ,  $\tau_2$  and  $\tau_3$  are the time constants of the three radiative decay channels;  $B_1$ ,  $B_2$  and  $B_3$  are the three corresponding amplitudes.

The average life time were calculated from the following equations.

$$\langle \tau \rangle = \frac{B_1 \tau_1^2 + B_2 \tau_2^2 + B_3 \tau_3^2}{B_1 \tau_1 + B_2 \tau_2 + B_3 \tau_3}$$

S7

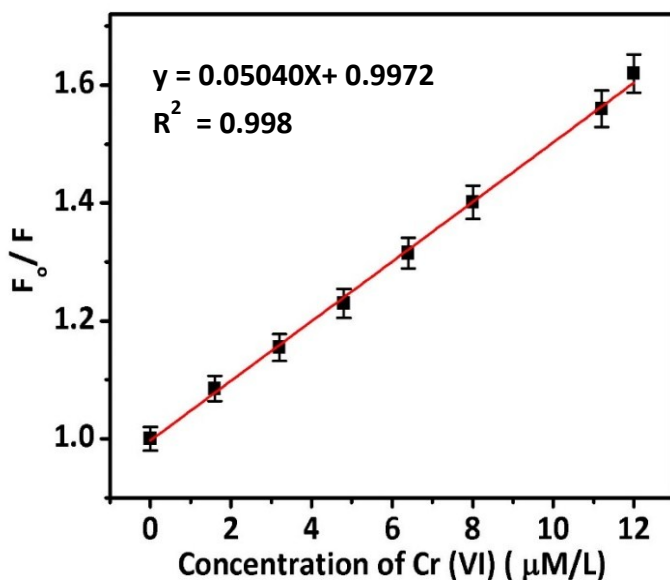

**Fig. S9.**  
Stern-  
volmer plot  
showing  
linear  
dependence

of  $F_0 / F$  with the concentration of Cr (VI) in the range of (0.0 – 12.2  $\mu\text{M/L}$ )

Stern-volmer equation

$$\frac{F_0}{F} = 1 + K_{sv} [Q] \quad (S1)$$

The change in the fluorescence intensity with concentration of Cr (VI) viz. ( $F_0 / F$  Vs Cr (VI) concentration), where  $F_0$  and  $F$  are the fluorescence intensity of N,P-CQDs in absence and presence of Cr (VI) solution at the excitation of 340 nm respectively

**Limit of detection (LOD):** It has been calculated based on three times the standard deviation [SD] rule.

$$\text{LOD} = 3 \cdot \text{SD} / m$$

Where,  $m$  is the slope of the linearly fitted graph and SD is standard deviation

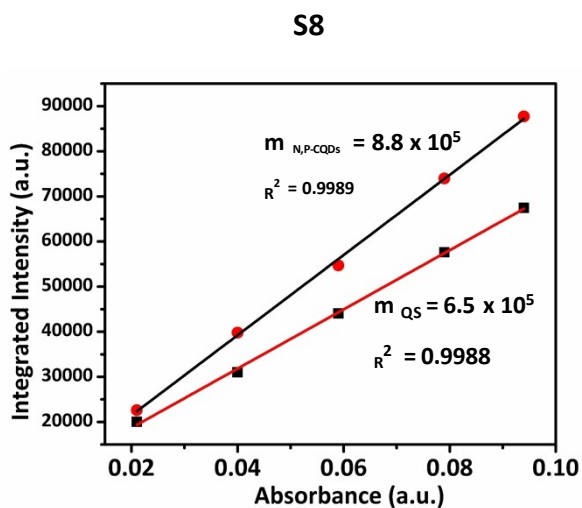

**Fig. S10.** Integrated intensity and absorbance of quinine sulphate and N,P-CQDs for measurement of fluorescence quantum yield at ( $\lambda_{\text{ex}} = 340 \text{ nm}$ ).

Quantum yield was calculated by using following equation

$$\Phi = \Phi_{\text{ref}} (m / m_{\text{ref}}) (\eta^2 / \eta_{\text{ref}}^2) \quad 2$$

Where  $\Phi$  is the quantum yield of N,P-CQDs,  $m$  is slope,  $\eta$  is the refractive index of the solvent ( $\text{H}_2\text{O} = 1.33$ ) ref. is the reference (quinine sulphate).

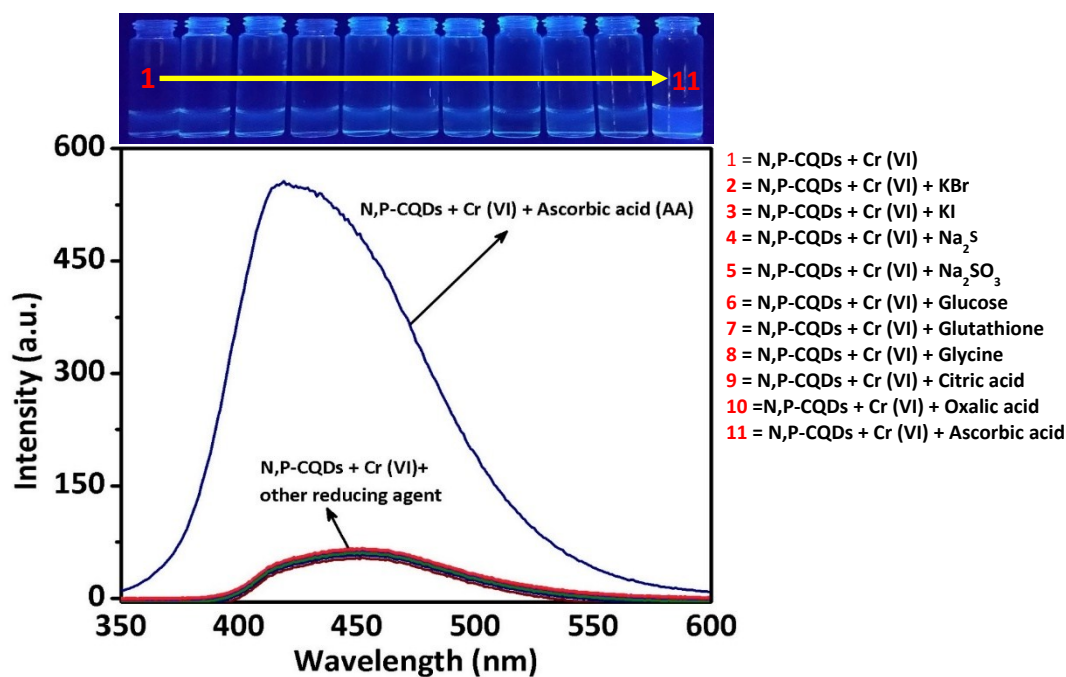

**Fig. S11** Selective turn on sensing of ascorbic acid by N,P-CQDs + Cr (VI) system in presence of other reducing agent.

S9

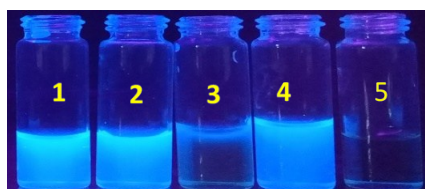

**Fig. S12** Photograph (1= N,P-CQDs, 2 = N,P-CQDs + Cr(III), 3 = N,P-CQDs + Cr(VI), 4 = N,P-CQDs + Cr (VI) + AA , 5 = Cr(VI) + AA) under UV- light ( $\lambda_{\text{ex}} = 365 \text{ nm}$ ).

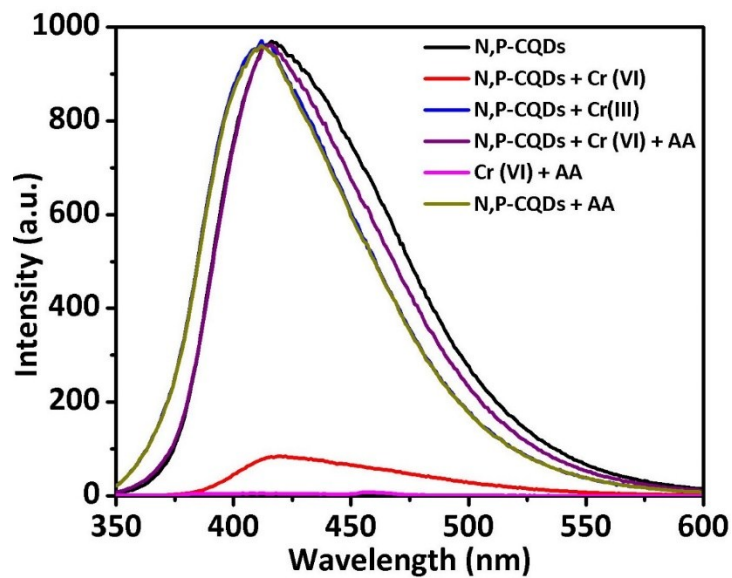

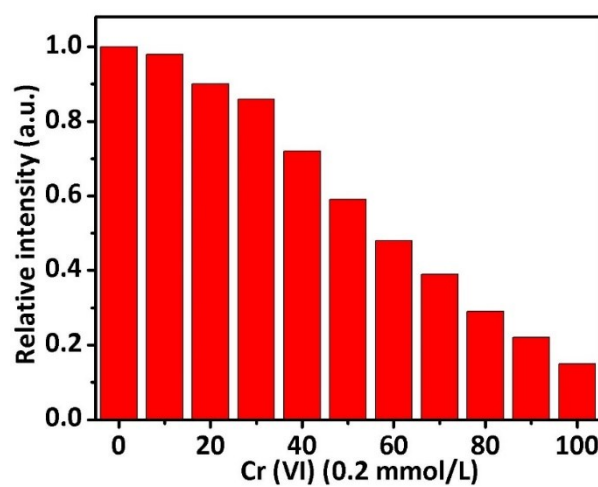

**Fig.S13**  
similar emission  
and N,P-CQDs + Cr (VI) + AA system.

Fluorescence spectra showing  
pattern of N,P-CQDs + Cr(III)

**Fig. S14.** Quenching of fluorescence intensity of N,P-CQDs at 414 nm after addition of (0 to 100  $\mu\text{L}$ ) of 0.2 mmol Cr(VI) solution.

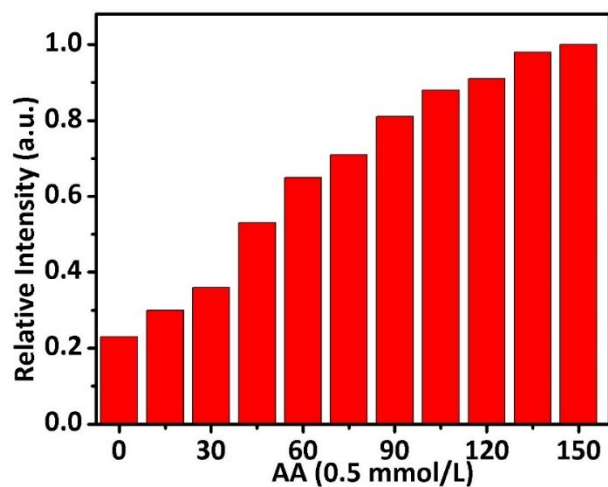

**Fig. S15.** Fluorescence recovery of N,P-CQDs + Cr (VI) system after addition of (0 to 150  $\mu\text{L}$ ) of 0.5mmol ascorbic acid solution.

S11

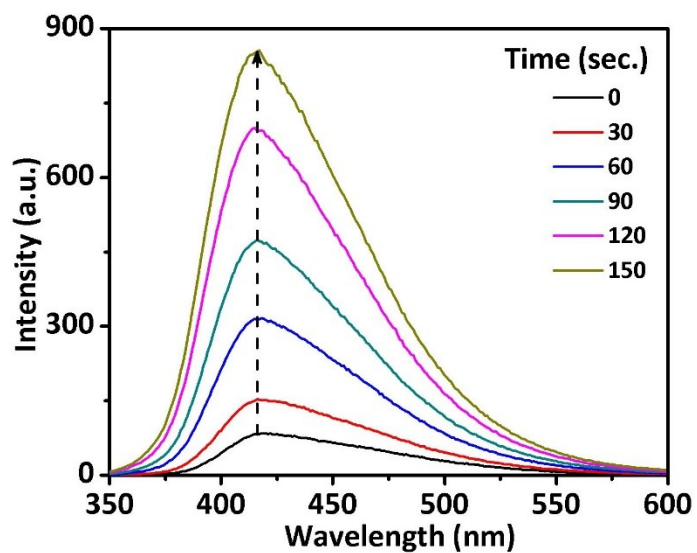

**Fig. S16.** Fluorescence recovery of N,P-CQDs + Cr(VI) system within 150 second after addition of 150  $\mu$ L of 0.5mmol/L ascorbic acid solution.
